# Supplementary material for: Foxp3 orchestrates reorganization of chromatin architecture to establish regulatory T cell identity
Source: Nat Commun. 2023 Nov 6;14:6943. doi: 10.1038/s41467-023-42647-y (PMC10628232; doi:10.1038/s41467-023-42647-y)
Supplement: Supplementary file 1 — Supplementary Information [file 41467_2023_42647_MOESM1_ESM.pdf]

## **Inventory of Supplementary Information**

**Supplementary Figure 1. Flow cytometry isolation of T cell populations in the thymus and spleen**

**Supplementary Figure 2. CRISPR deletion of Foxp3 sites near the Ikzf2 gene**

**Supplementary Figure 3. CRISPR/Cas9 deletion of Foxp3 in mature Treg cells**

**Supplementary Data 1. Hi-C sequencing statistics**

**Supplementary Data 2. Differential chromatin interactions between Treg and Tcon**

**Supplementary Data 3. Differential gene expression between WT and KIKO Tregs**

**Supplementary Data 4. Differential gene expression between WT and DSM Tregs**

**Supplementary Data 5. Differential Foxp3 Cut&Tag between WT and DSM Tregs**

**Supplementary Data 6. Foxp3 PLAC-seq significant interactions**

**Supplementary Table 1. ssDNA sequence for generating Foxp3 DSM mutant mouse**

**Supplementary Table 2. Antibodies used in this study**

**Supplementary Table 3. Foxp3/CTCF Binding sites in Ikzf2 locus and related targeted sgRNA sequences**

## Supplementary Figure Legends

**Supplementary Figure 1. Flow cytometry isolation of T cell populations in the thymus and spleen.** (a) Flow cytometric gating strategy to isolate T cells in the thymus, including CD4<sup>-</sup>CD8<sup>-</sup> (DN), CD4<sup>+</sup>CD8<sup>+</sup> (DP), CD4<sup>-</sup>CD8<sup>+</sup> (CD8SP), CD4<sup>+</sup>CD8<sup>-</sup>Foxp3<sup>-</sup>CD25<sup>-</sup> (CD4SP), CD4<sup>+</sup>CD8<sup>-</sup>Foxp3<sup>-</sup>CD25<sup>+</sup> (CD25<sup>+</sup> Treg precursor), CD4<sup>+</sup>CD8<sup>-</sup>Foxp3<sup>lo</sup>CD25<sup>-</sup> (Foxp3<sup>lo</sup> Treg precursor), CD4<sup>+</sup>CD8<sup>-</sup>Foxp3<sup>+</sup>CD25<sup>+</sup> (Treg). (b) Flow cytometric gating strategy to isolate CD4<sup>+</sup>Foxp3<sup>-</sup> (conventional T cells, Tcon) and CD4<sup>+</sup>Foxp3<sup>+</sup> (mature Treg) from the spleen. (c) Heat map showing changes in Treg and Tcon specific chromatin interactions during T-cell lineage development by K-means clustering (k=6). The top panel shows Treg specific interactions, the bottom panel shows Tcon specific interactions. Each row is normalized relative to the mean obs/exp interaction frequency across each lineage.

**Supplementary Figure 2. CRISPR deletion of Foxp3 sites near the Ikzf2 gene.** (a) Hi-C chromatin interactions near the Ikzf2 gene. The heatmap shows Hi-C data near Ikzf2, while the ChIP-seq tracks below show signals for CTCF and Foxp3 binding. Also labeled are the locations of the 9 deleted Foxp3 sites (P1-P9). (b) Flow cytometric analysis of the expression of Helios after CRISPR knockout of indicated Foxp3-bound sites (Ikzf2 P1-P9) in Treg cells. *p*-values were calculated by an unpaired, two-sided Student's *t*-test. Data are represented as mean  $\pm$  s.e.m. Representative data of two independent experiments are shown. Source data are provided as a Source Data file.

**Supplementary Figure 3. CRISPR/Cas9 deletion of Foxp3 in mature Treg cells.** (a)

Schematic of experimental strategy for deletion of Foxp3 in mature Treg cells. (b) FACS plots showing sgFoxp3 targeting efficiency in knockdown of Foxp3 expression in Treg cells. *p*-values were calculated by an unpaired, two-sided Student's *t*-test. Data are represented as mean  $\pm$  s.e.m. Representative data of two independent experiments are shown. Source data are provided as a Source Data file. (c) Comparison of chromatin interactions between sgControl and sgFoxp3 targeted Treg cells. The plot shows the strength of chromatin contacts (X-axis) and the fold change in chromatin interaction frequency (y-axis) between sgControl and sgFoxp3 targeted cells. Only one interacting locus shows a significant difference in interaction frequency (colored in red). (d) Violin plots of fold change in chromatin interaction frequency between mutant and wild type comparing the effects in the Foxp3 KIKO Treg cells (left, orange) and in Foxp3 sgRNA targeted cells (right, blue).

**a** Gating strategy for T cells in the thymus

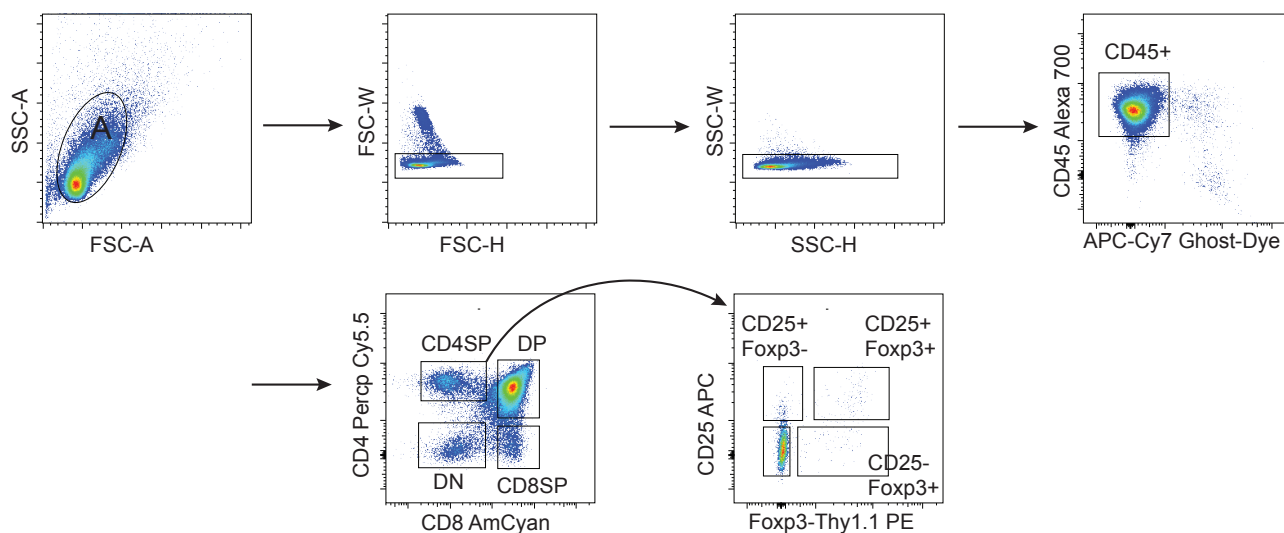

**b** Gating strategy for Treg and Tcon cells in the spleen

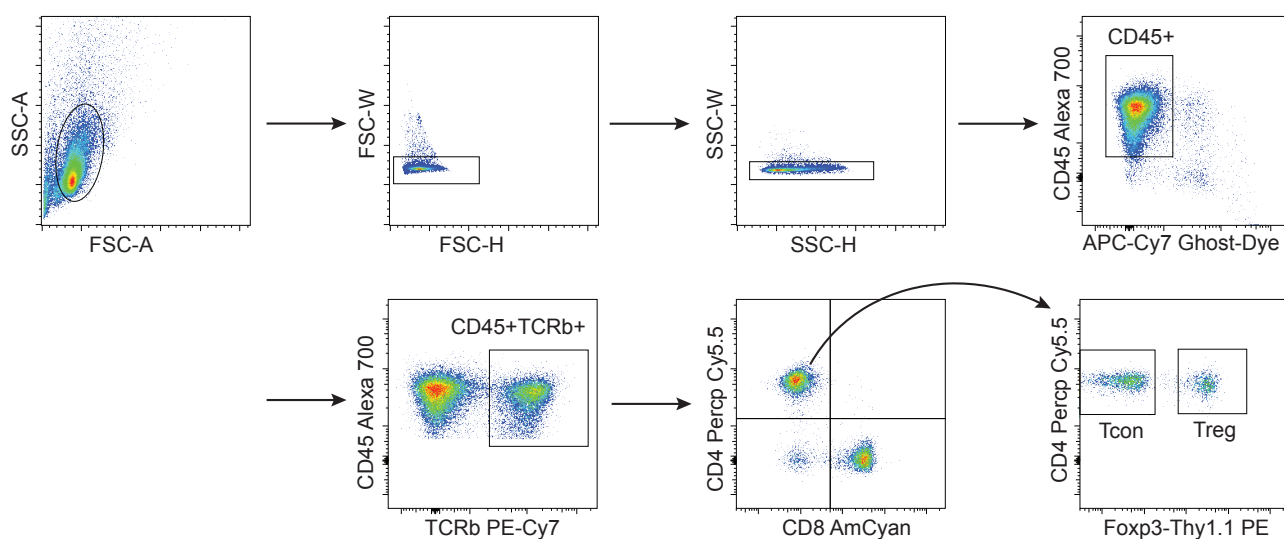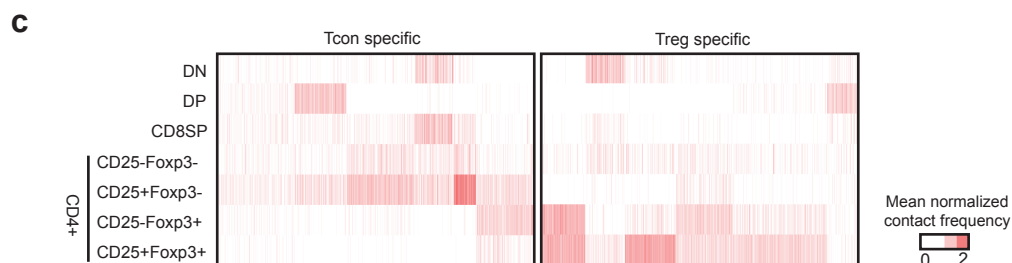

**Supplementary Figure 1**

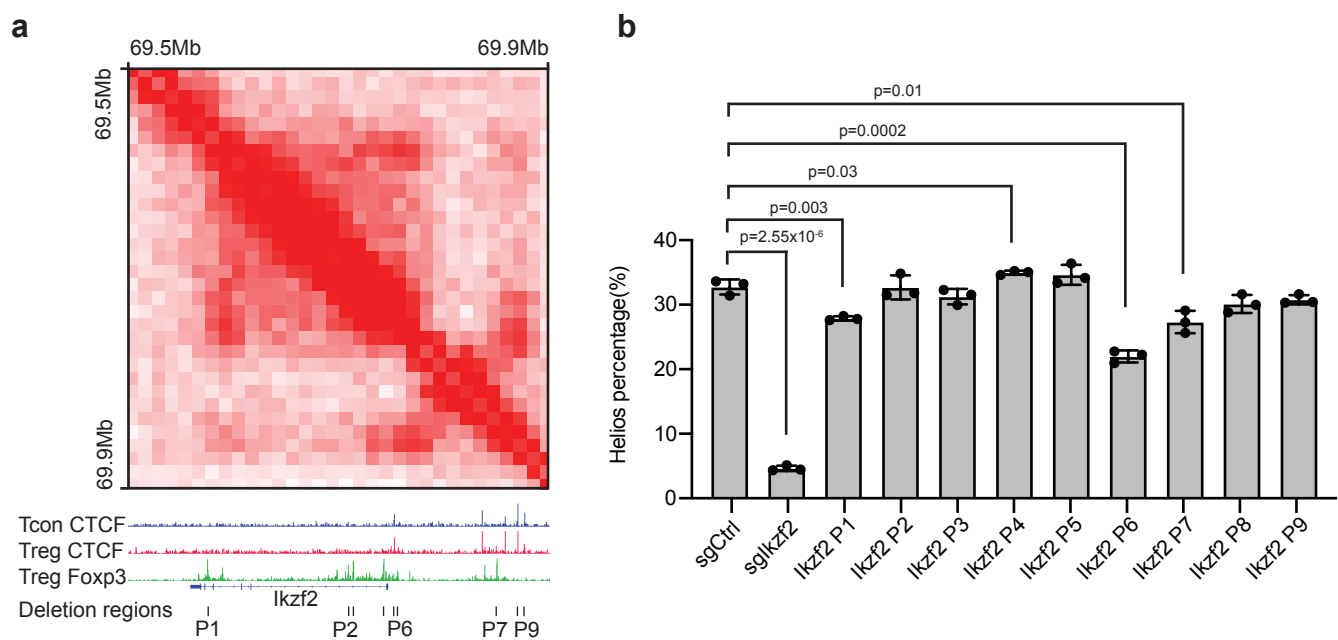

**Supplementary Figure 2**

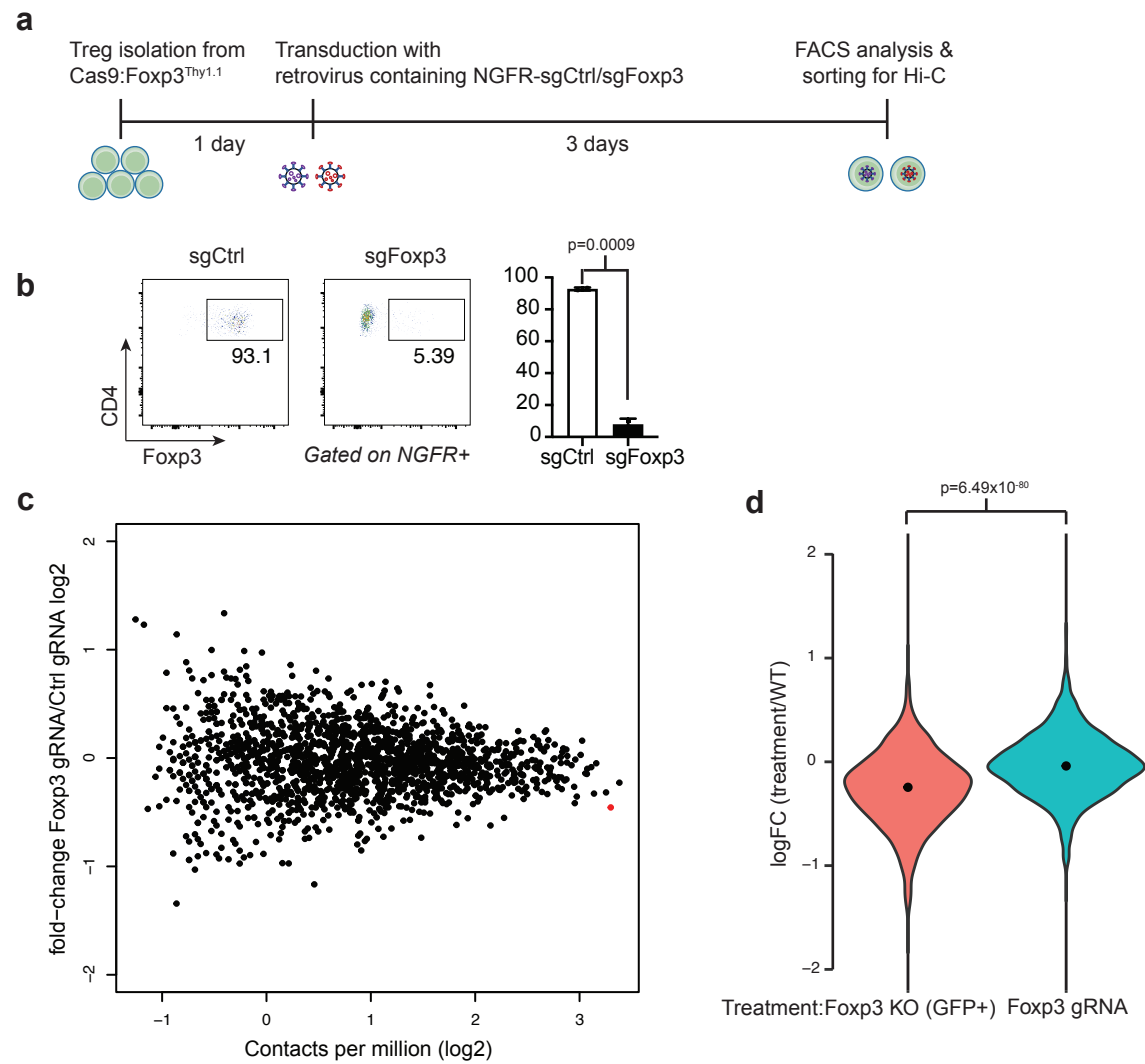

**Supplementary Figure 3**

## Supplementary Table 1, ssDNA sequence for generating Foxp3 DSM mutant mouse

```

aagtcaggtg cactcaacca agctaacc aa ccctctccca cctgtcaggc ctgggttggtg
agtttaccag ggaccataga tatttggtgt caggctggct atgccacttg agctgcttac
atgcctttga tgtacaaatt acttgactcc tttttaaggt gaggagagct atttggcagg
agtactgcaa agaagacaca gcttacggcg ggtactcagt aaacagtact atgtgtgagc
atagactgtc cctccccctt tgggtgctagt ggtaggaatt gagaccttgg attcctgatg
cagacaaagg tggggtaggg ggtgaggagg ccaaaggctc tgatctatgc caaccttctg
cagagttctt ccacaacatg gactacttca agtatcacia tatgcgaccc cttttcacct
atgccaccct tatccgacag gtaagcaggg caatagaggc ccagcagctg gtgggcggca
gggggggaggt tgtggtgggg agtgcttgcc tcctacattg caccaagagc agaattcacc
cattaacaaa cctcagctct gaggagcccc aagatgtgat ctttcttgat agcttcacct
cagatctagc cctcaaccca aaactactgc aagccaggtc agtgcaaagc aaactgtaac
actacaaact accctttcct ttgtccaccc tatctctaac atcacccttg acctcatgcc
tcaccctatt ctttctcctt ccccttgacc cacaattaca aagctatcat agctcagagg
gccgagagta ggctgctccc tcagccacia ccctgaggaa catgcccctt attccacctg
actccaactt ccaggccatc ctggaagccc cggagaggca gaggacactc aatgaaatct
accattggtt tactcgcact ttcccgtact tcagaaacca ccccgccacc tggaaagtga
gttcctctgt acacactggc agctgggatg gctccaagga tggttagcct ggggctagac
atgtggggaa ggagcaggtc agtctcagac tcaggatgac tgtcaaccct gtccctgact
ggggtcccgg tcccccttcc acagaatgcc atccgccaca acctgagcct gcacaagtgc
tttgtgagag tggagagcga gaaggagcga gtgtggaccg tagatgaatt tgagtttctgc
aagaagagga gccaacgccc caacaagtgc tccaatccct gcccttgacc tcaaaaccaa
gaaaaggtgg gcgggggagg gggccaaaac catgagactg aggctgtggg ggcaaggagg
caagtcctac gtgtacctat

```

The three DNA codons labeled in red color encode the 3 amino acid mutations in the Foxp3DSM mutant.

**Supplementary Table 2, Antibodies used in this study**

| Target protein                   | Vendor      | Catalog #    | clone    | dilution      |
|----------------------------------|-------------|--------------|----------|---------------|
| CD45.2-Alexa 700                 | Biolegend   | 109822       | 104      | Flow (1:400)  |
| CD45RB-APC                       | eBioscience | 17-0455-81   | C363.16A | Flow (1:400)  |
| TCRb-PE-Cy7                      | eBioscience | 25-5961-82   | H57-597  | Flow (1:400)  |
| TCRgd-PE                         | BioLegend   | 118108       | GL3      | Flow (1:400)  |
| CD3-BV650                        | BioLegend   | 100229       | 17A2     | Flow (1:400)  |
| CD4-PerCP-Cy5.5                  | TONBO       | 65-0042-U100 | RM4-5    | Flow (1:400)  |
| CD8-BV510                        | Biolegend   | 100752       | 53-6.7   | Flow (1:400)  |
| CD25-FITC                        | TONBO       | 35-0251-U100 | PC61.5   | Flow (1:400)  |
| CD44-BV650                       | Biolegend   | 103049       | IM7      | Flow (1:400)  |
| CD62L-BV605                      | Biolegend   | 104438       | MEL-14   | Flow (1:400)  |
| IFNg-APC                         | eBioscience | 17-7311-82   | XMG1.2   | Flow (1:400)  |
| IL-5-PE                          | eBioscience | 12-7052-82   | TRFK5    | Flow (1:400)  |
| Il-13- eflour660                 | eBioscience | 50-7133-82   | eBio13A  | Flow (1:400)  |
| IL-17-PE                         | eBioscience | 12-7177-81   | eBio17B7 | Flow (1:400)  |
| human CD2-PE                     | eBioscience | 12-0021-83   | RPA-2.10 | Flow (1:200)  |
| NGFR-APC                         | Biolegend   | 345108       | ME20.4   | Flow (1:400)  |
| Ghost Viability Dye              | TONBO       | 13-0865-T100 |          | Flow (1:1000) |
| CTCF                             | Millipore   | 07-729       |          | ChIP          |
| Foxp3 Rabbit polyclonal antibody | In house    |              |          | ChIP          |

**Supplementary Table 3, Foxp3/CTCF Binding sites in Ikzf2 locus and related targeted sgRNA sequences.**

| ChIP-seq peak            | Chromosome coordinates | Assigned region name | gRNA sequence        | gRNA targeting location |
|--------------------------|------------------------|----------------------|----------------------|-------------------------|
| Treg_Foxp3ChIP_MACS_peak | chr1:69590531-69591726 | P1                   | ACCCCAGAACTCATCTAAGG | chr1:69590510           |
|                          |                        |                      | AAGGTTTGATGTCTGCCCGG | chr1:69591970           |
| Treg_Foxp3ChIP_MACS_peak | chr1:69699765-69700462 | P2                   | AATAATAATTCTGGTCATGG | chr1:69699360           |
|                          |                        |                      | ACACATCTTTAACAGTACAG | chr1:69700490           |
| Treg_Foxp3ChIP_MACS_peak | chr1:69703613-69704447 | P3                   | TAAAAACAAATGCTGCGCAG | chr1:69703550           |
|                          |                        |                      | AATGGGAGCGAAACTGATTG | chr1:69704690           |
| Treg_Foxp3ChIP_MACS_peak | chr1:69726524-69728147 | P4                   | GCTATAAGTATAGAGTGTCT | chr1:69726650           |
|                          |                        |                      | GGGTGAGAAAGTCCCAGTGT | chr1:69727980           |
| Treg_CTCF_MACS_peak      | chr1:69735671-69735970 | P5                   | GCGTATCTGCAAAGTCATGG | chr1:69735550           |
|                          |                        |                      | TAAACCGTAGCAATTCACGT | chr1:69736110           |
| Treg_Foxp3ChIP_MACS_peak | chr1:69738549-69739093 | P6                   | TGAGATGCCCGATATAGTAT | chr1:69738330           |
| Treg_CTCF_MACS_peak      | chr1:69738974-69739155 |                      | GGTAATGTGCTAGACACCTG | chr1:69739250           |
| Treg_Foxp3ChIP_MACS_peak | chr1:69815193-69816119 | P7                   | GCTTGAGATGCTGATCCTAG | chr1:69814970           |
|                          |                        |                      | AACTTGCCGATTGCTACAGG | chr1:69815980           |
| Treg_CTCF_MACS_peak      | chr1:69831756-69832019 | P8                   | GGCTTGTTAGCTCTCAAGCA | chr1:69831290           |
|                          |                        |                      | AATGAATTAGGCATTAGCAG | chr1:69832430           |
| Treg_CTCF_MACS_peak      | chr1:69836869-69837145 | P9                   | AAAAGATGCCCTTATCTATG | chr1:69836880           |
|                          |                        |                      | GCCTTATGTGGGTAGCATGG | chr1:69837400           |
|                          |                        | sgIkzf2-exon4        | ACCCCTAATTGAGAGCAGCG |                         |
